# Supplementary material for: Perturbation of the UV transitions of formaldehyde by TiO2photocatalysts and Aunnanoclusters
Source: Royal Society of Chemistry journal article supplement (doi:10.1039/d1cp05820g), 2022-01-01
Supplement: d1cp05820g1.pdf [file d1cp05820g1.pdf]

# Supporting Information: Perturbation of the UV transitions of formaldehyde by $\text{TiO}_2$ photocatalysts and $\text{Au}_n$ nanoclusters

Nicolai Machholdt Høyer, Matthew S. Johnson, and, Kurt V. Mikkelsen

December 21, 2021

## **1 UV-Vis spectra for formaldehyde on $\text{TiO}_2$**

Calculated UV-Vis spectra of formaldehyde when placed on the  $\text{TiO}_2$ -surface. All excitation energies and oscillator strengths have been calculated with the CCSD linear response method and the aug-cc-pcTZ basis set. For each geometry the difference in the UV-VIS spectra between the closest and farthest position of formaldehyde (near and far results) and the change in the spectra when formaldehyde is in the six closest positions (near results).

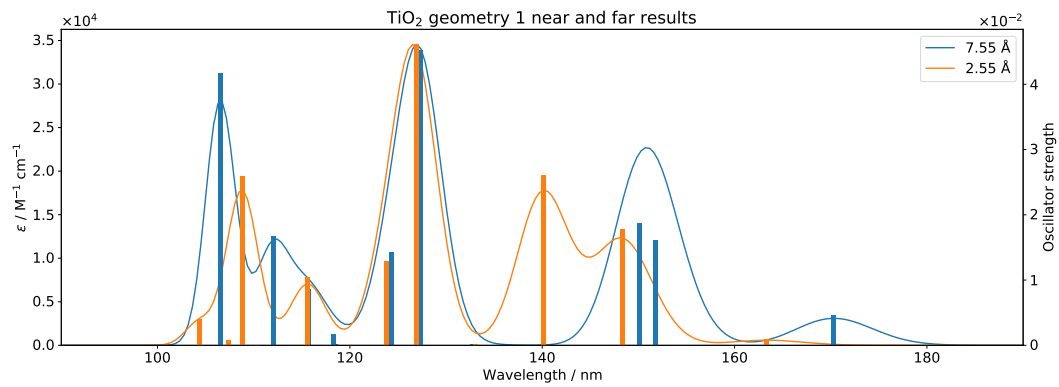

(a) UV-VIS: Formaldehyde in geometry 1. Nearest and farthest distance

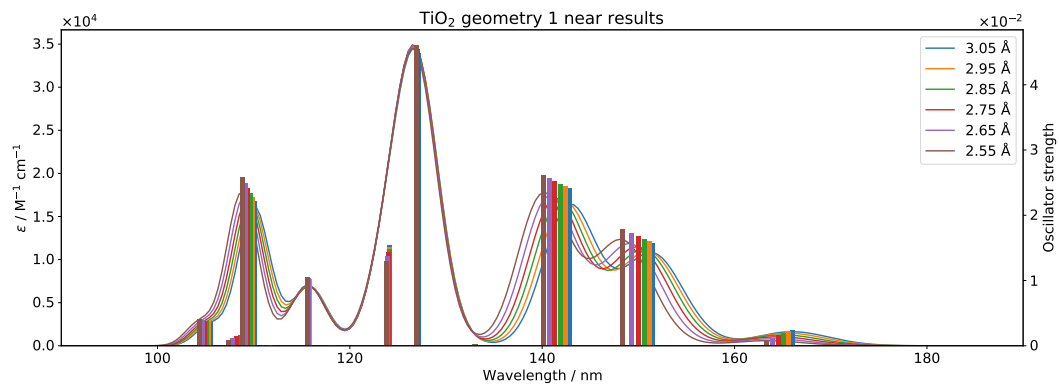

(b) UV-VIS: Formaldehyde in geometry 1. The six nearest distances

Figure 1: Results for TiO<sub>2</sub> geometry 1

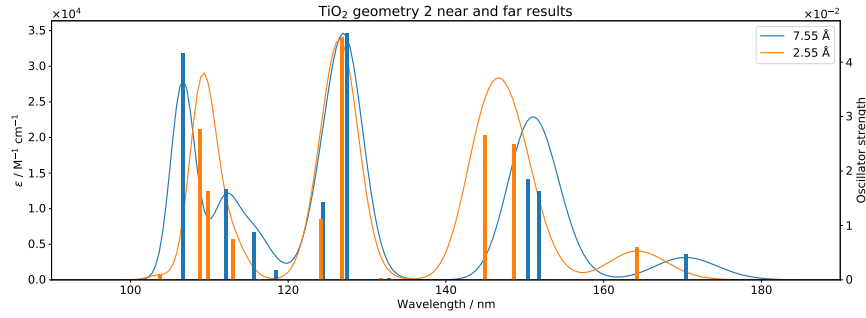

(a) UV-VIS: Formaldehyde in geometry 2. Nearest and farthest distance

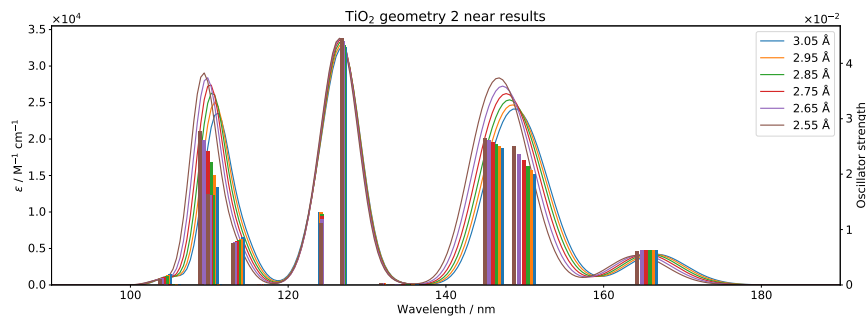

(b) UV-VIS: Formaldehyde in geometry 2. The six nearest distances

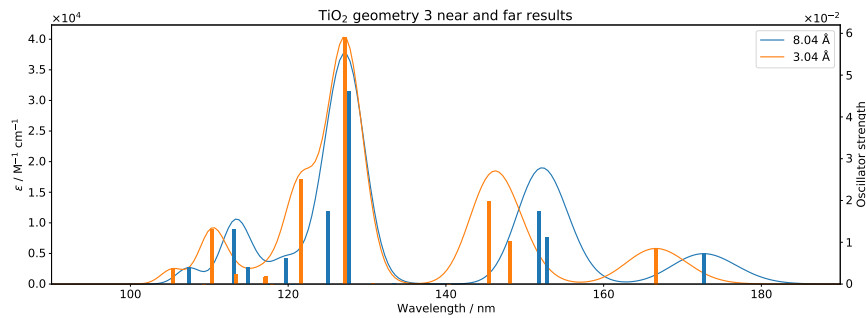

(c) UV-VIS: Formaldehyde in geometry 3. Nearest and farthest distance

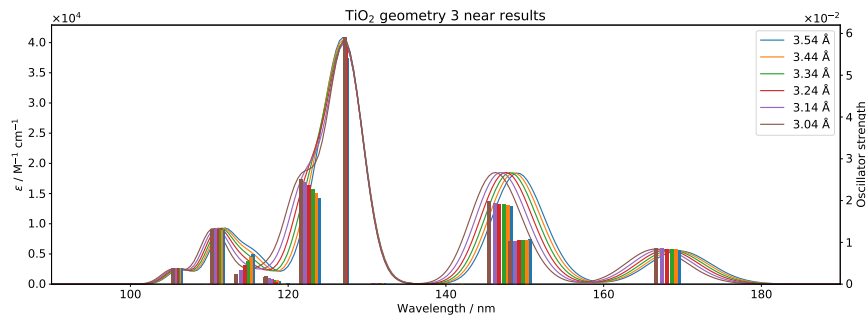

(d) UV-VIS: Formaldehyde in geometry 3. The six nearest distances

Figure 2: Results for TiO<sub>2</sub> geometry 2 and 3

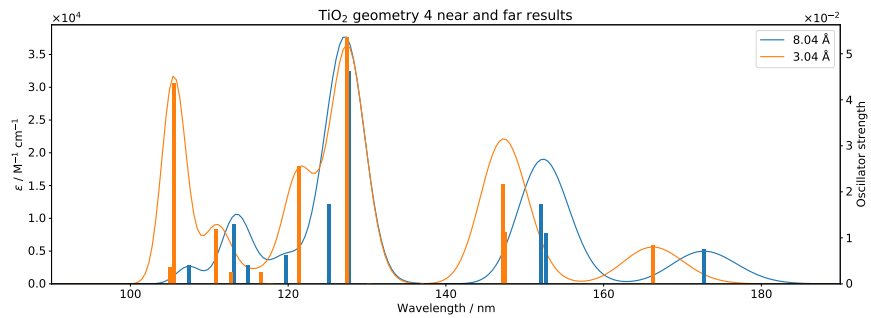

(a) UV-VIS: Formaldehyde in geometry 4. Nearest and farthest distance

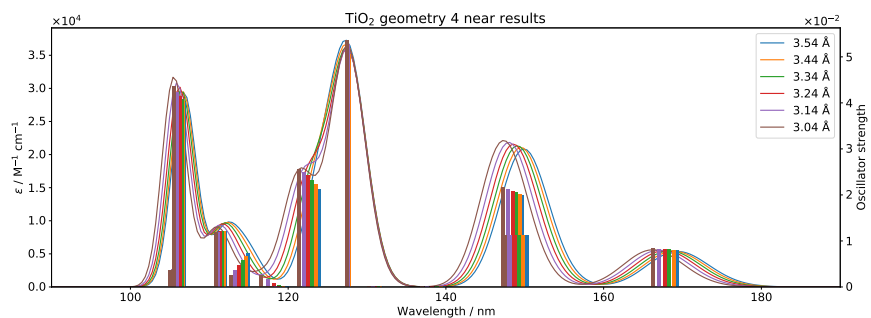

(b) UV-VIS: Formaldehyde in geometry 4. The six nearest distances

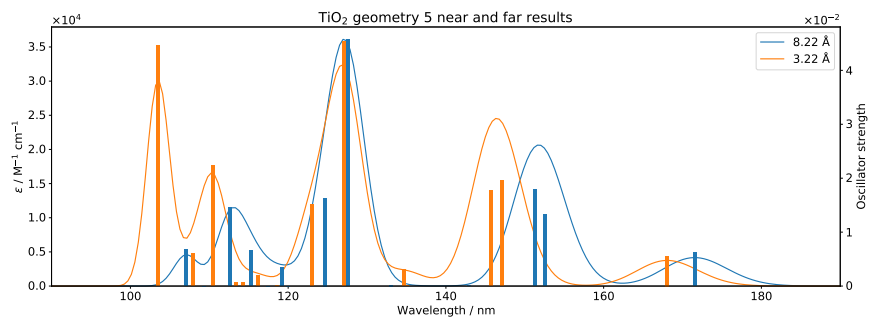

(c) UV-VIS: Formaldehyde in geometry 5. Nearest and farthest distance

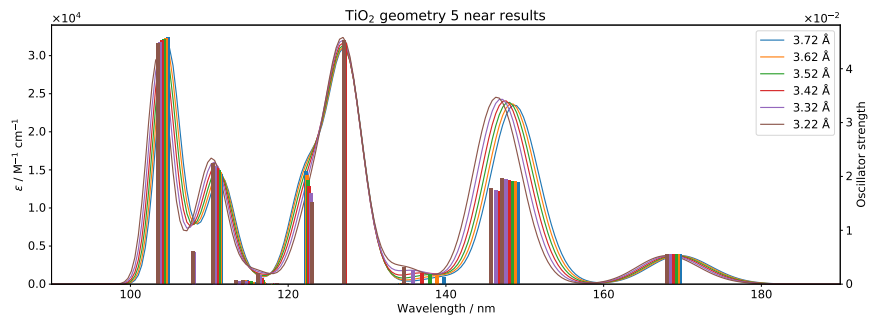

(d) UV-VIS: Formaldehyde in geometry 5. The six nearest distances

Figure 3: Results for TiO<sub>2</sub> geometry 4 and 5

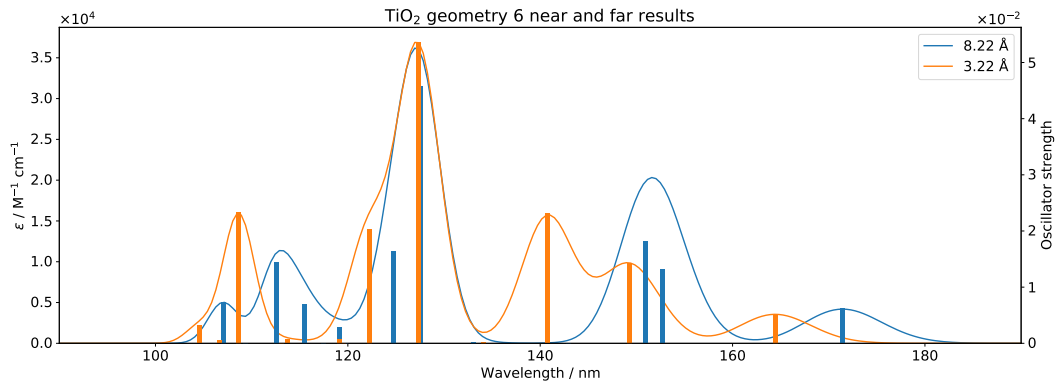

(a) UV-VIS: Formaldehyde in geometry 6. Nearest and farthest distance

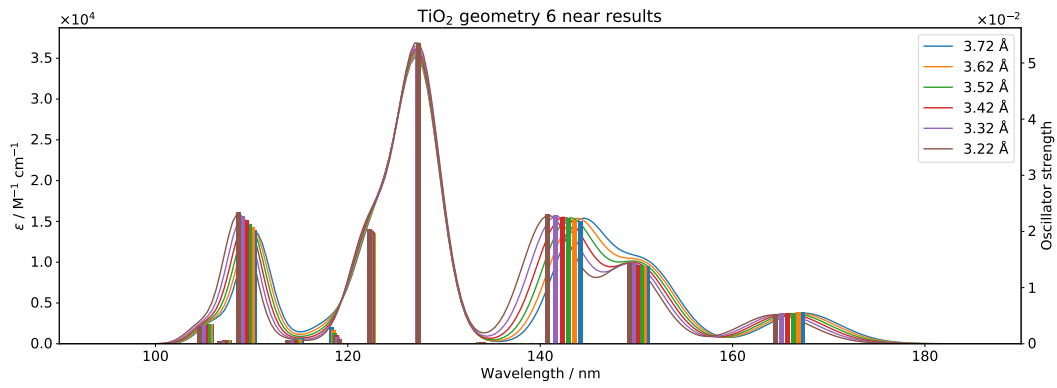

(b) UV-VIS: Formaldehyde in geometry 6. The six nearest distances

Figure 4: Results for TiO<sub>2</sub> geometry 6

## 2 UV-Vis spectra for fomaldehyde on Au/TiO<sub>2</sub>

Calculated UV-Vis spectra of formaldehyde when placed on the Au/TiO<sub>2</sub>-surface. All the excitation energies and oscillator strengths have been calculated with the CCSD linear response method and the aug-cc-pcTZ basis set. For each geometry the difference in the UV-Vis spectra between the closest and farthest position of formaldehyde (near and far results) and the change in the spectra when formaldehyde is in the six closest positions (near results).

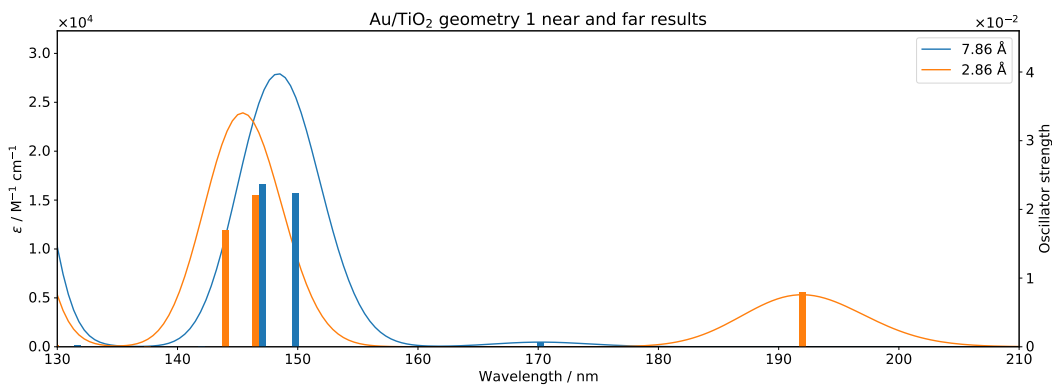

(a) UV-VIS: Formaldehyde in geometry 1. Nearest and farthest distance

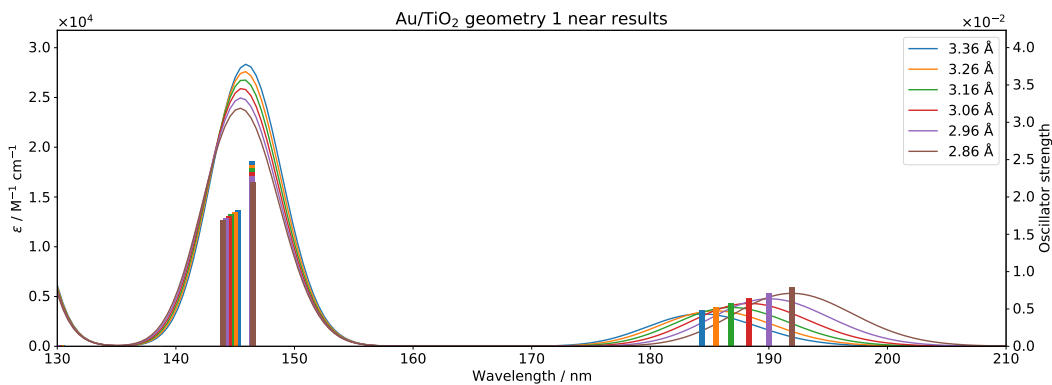

(b) UV-VIS: Formaldehyde in geometry 1. The six nearest distances

Figure 5: Results for Au/TiO<sub>2</sub> geometry 1

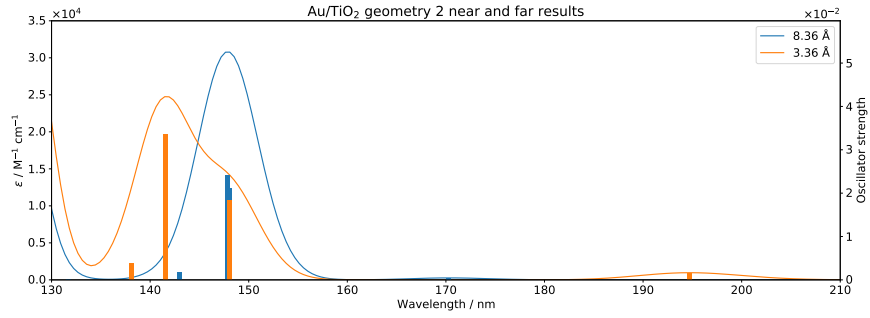

(a) UV-VIS: Formaldehyde in geometry 2. Nearest and farthest distance

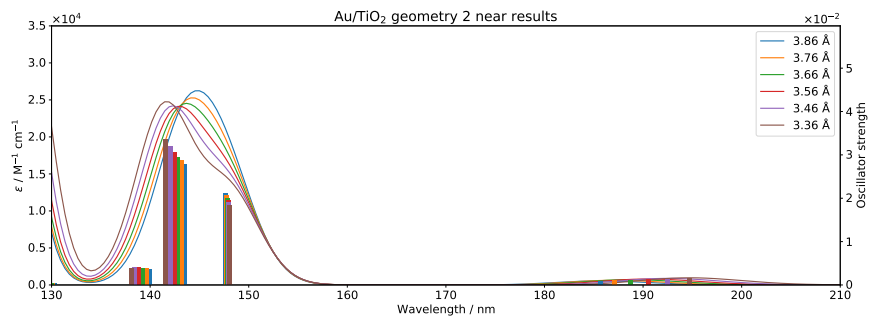

(b) UV-VIS: Formaldehyde in geometry 2. The six nearest distances

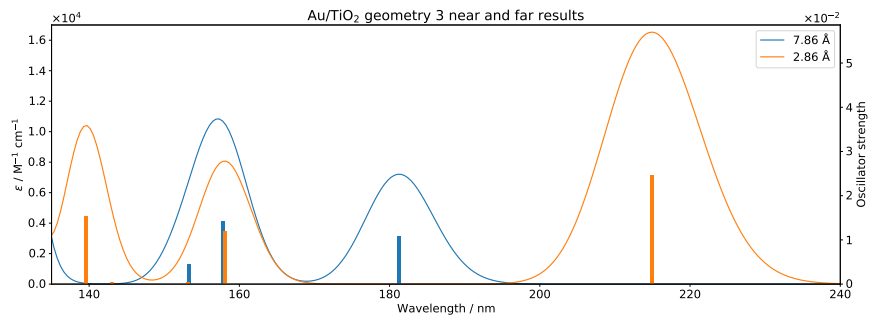

(c) UV-VIS: Formaldehyde in geometry 3. Nearest and farthest distance

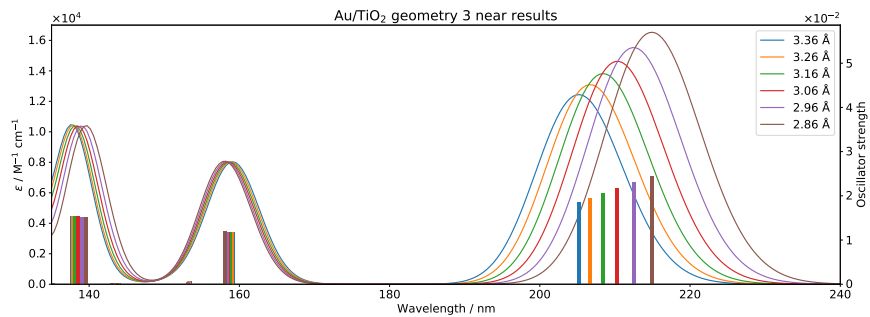

(d) UV-VIS: Formaldehyde in geometry 3. The six nearest distances

Figure 6: Results for Au/TiO<sub>2</sub> geometry 2 and 3

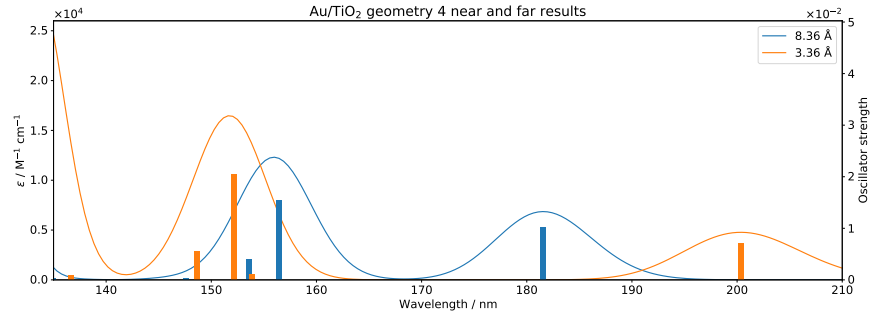

(a) UV-VIS: Formaldehyde in geometry 4. Nearest and farthest distance

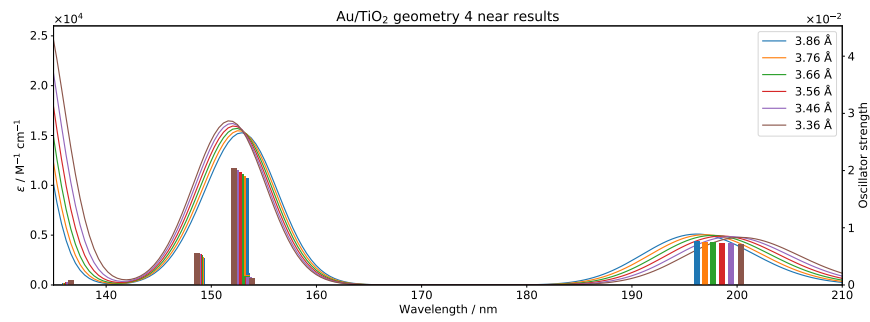

(b) UV-VIS: Formaldehyde in geometry 4. The six nearest distances

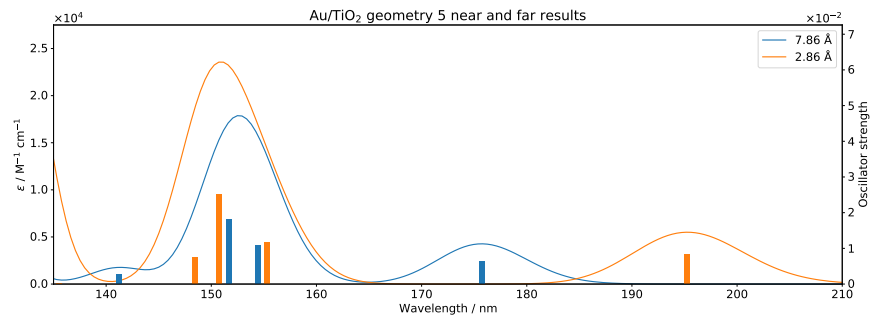

(c) UV-VIS: Formaldehyde in geometry 5. Nearest and farthest distance

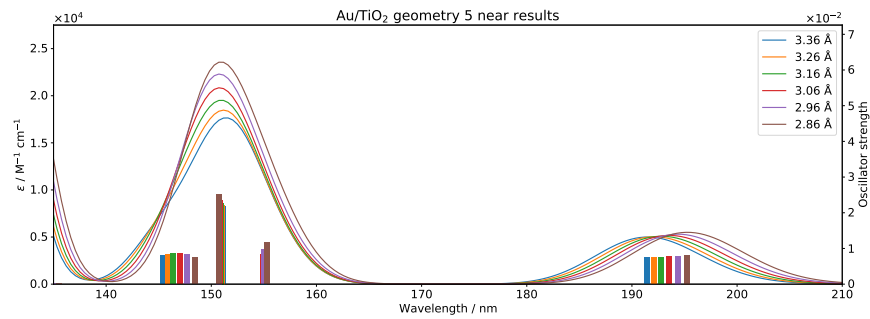

(d) UV-VIS: Formaldehyde in geometry 5. The six nearest distances

Figure 7: Results for Au/TiO<sub>2</sub> geometry 4 and 5



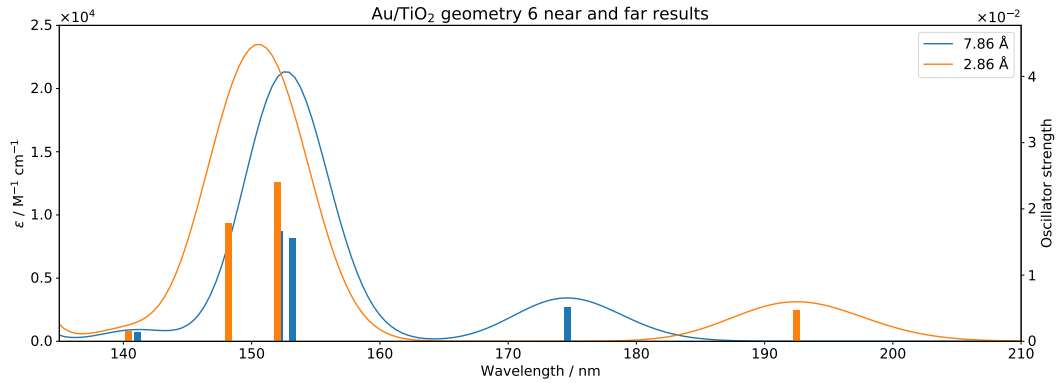

(a) UV-VIS: Formaldehyde in geometry 6. Nearest and farthest distance

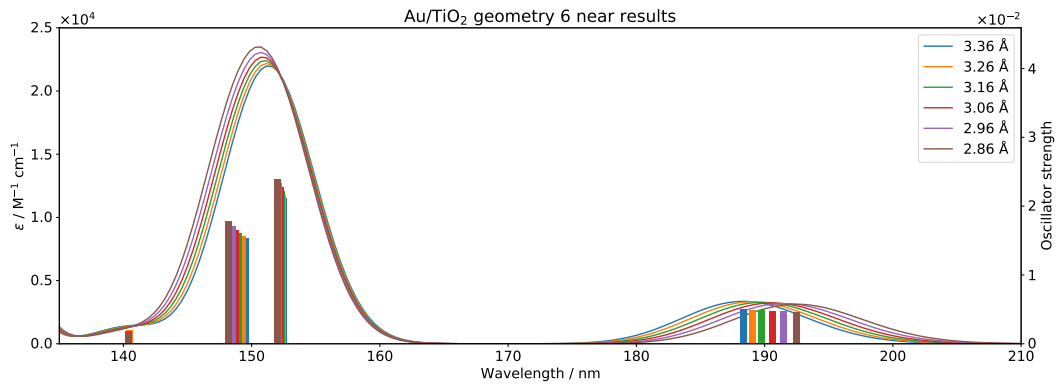

(b) UV-VIS: Formaldehyde in geometry 6. The six nearest distances

Figure 8: Results for Au/TiO<sub>2</sub> geometry 6

### 3 UV-Vis spectra for formaldehyde on Au

Calculated UV-Vis spectra of formaldehyde when placed on the gold nanoparticle. All the excitation energies and oscillator strengths have been calculated with the CCSD linear response method and the aug-cc-pcTZ basis set. For each geometry the difference in the UV-Vis spectra between the closest and farthest position of formaldehyde (near and far results) and the change in the spectra when formaldehyde is in the six closest positions (near results).

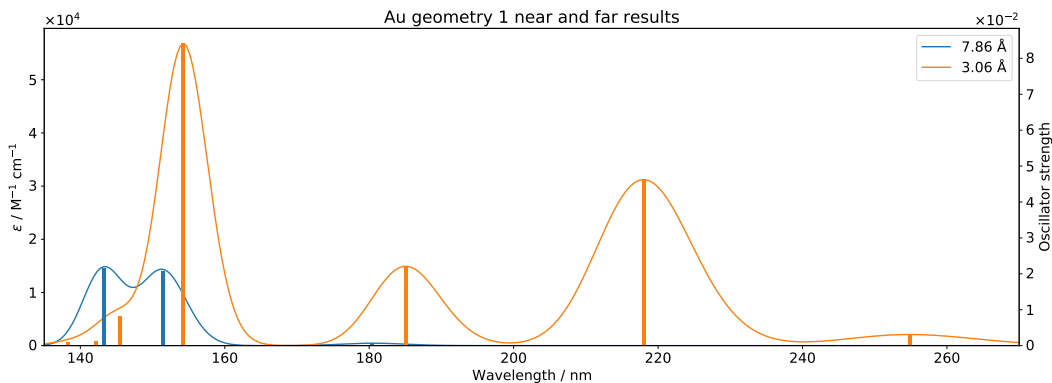

(a) UV-VIS: Formaldehyde in geometry 1. Nearest and farthest distance

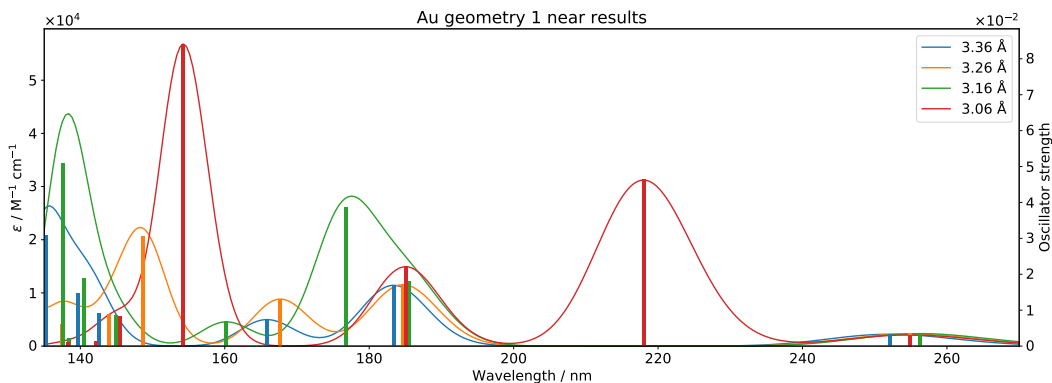

(b) UV-VIS: Formaldehyde in geometry 1. The six nearest distances

Figure 9: Results for Au geometry 1

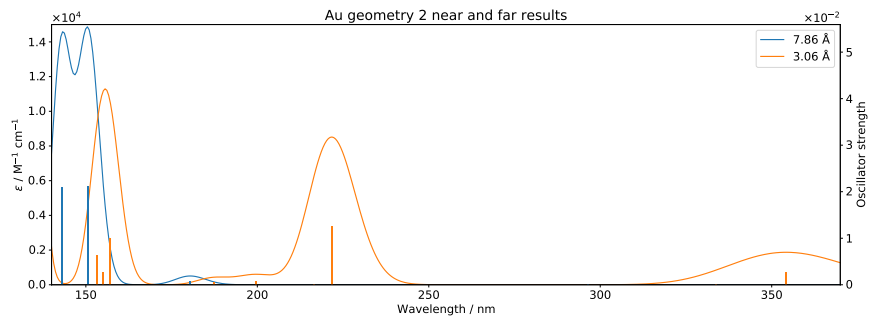

(a) UV-VIS: Formaldehyde in geometry 2. Nearest and farthest distance

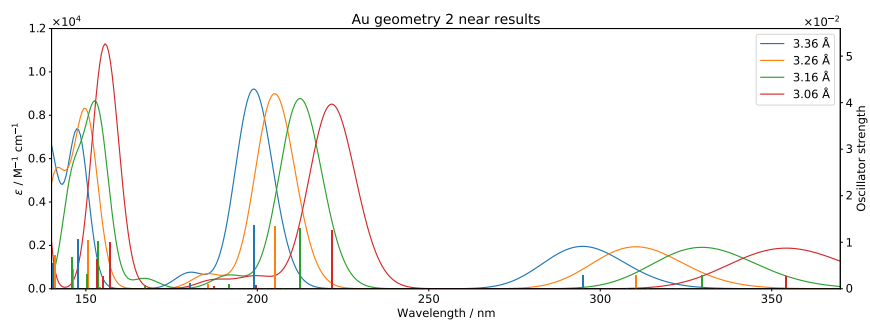

(b) UV-VIS: Formaldehyde in geometry 2. The six nearest distances

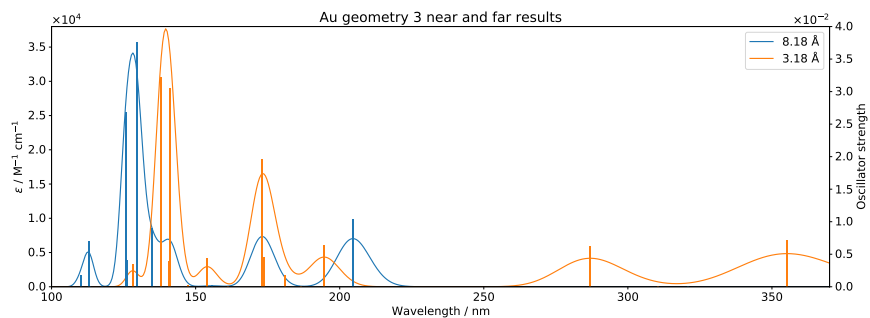

(c) UV-VIS: Formaldehyde in geometry 3. Nearest and farthest distance

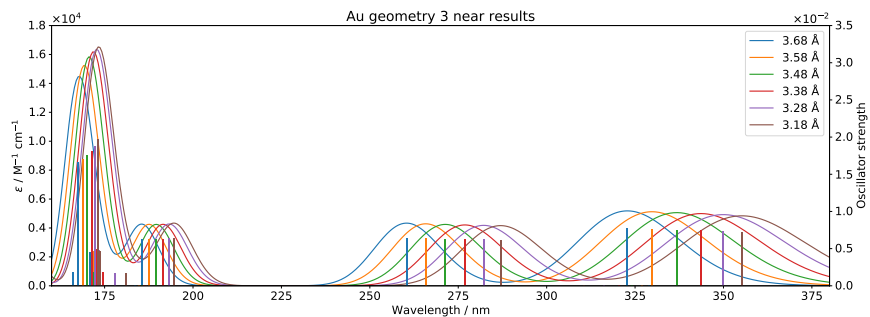

(d) UV-VIS: Formaldehyde in geometry 3. The six nearest distances

Figure 10: Results for Au geometry 2 and 3

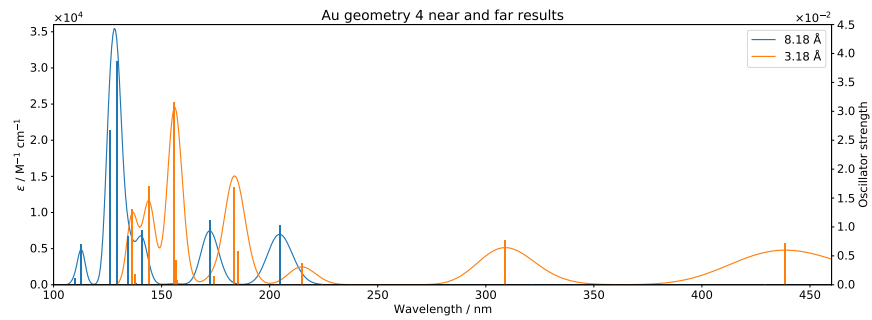

(a) UV-VIS: Formaldehyde in geometry 4. Nearest and farthest distance

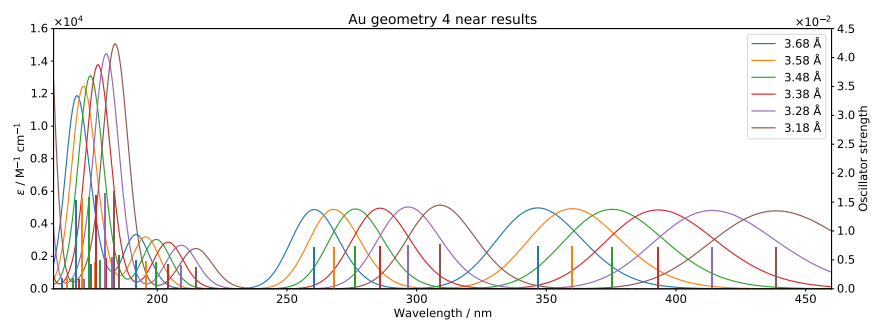

(b) UV-VIS: Formaldehyde in geometry 4. The six nearest distances

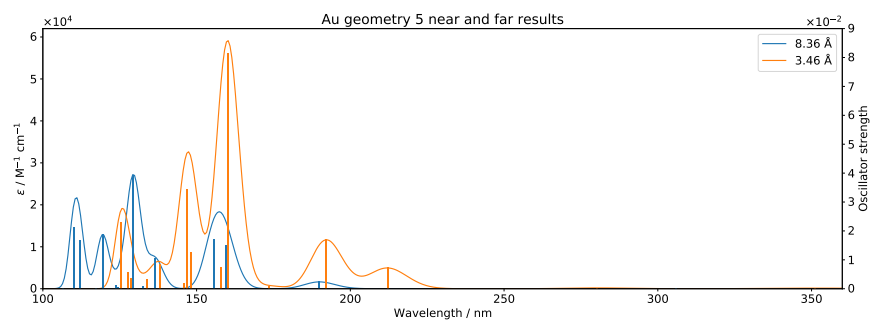

(c) UV-VIS: Formaldehyde in geometry 5. Nearest and farthest distance

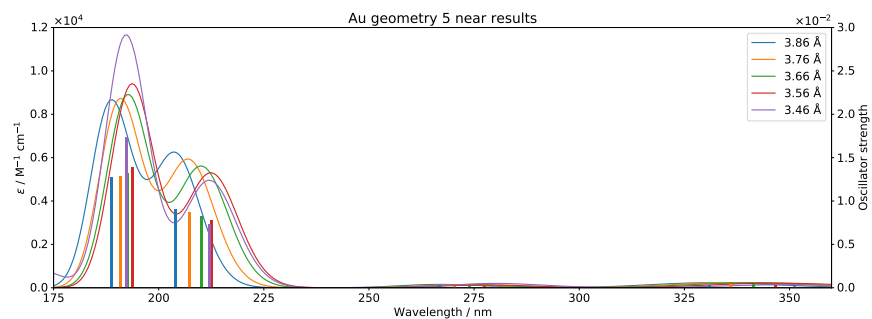

(d) UV-VIS: Formaldehyde in geometry 5. The six nearest distances

Figure 11: Results for Au geometry 4 and 5

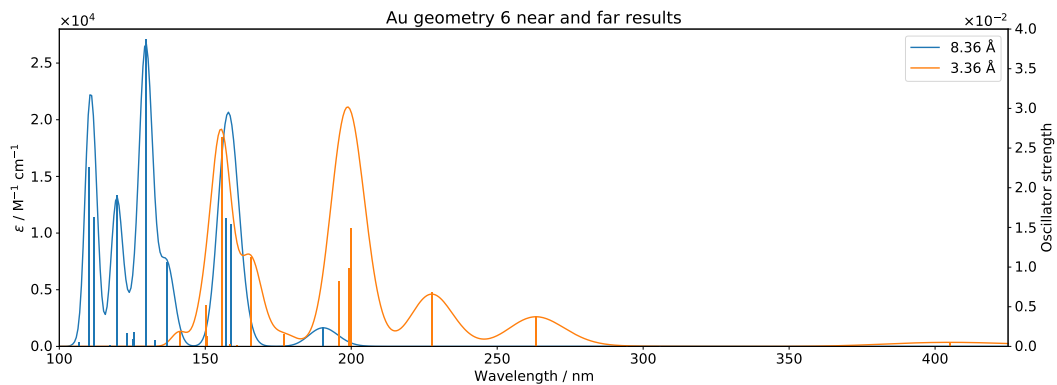

(a) UV-VIS: Formaldehyde in geometry 6. Nearest and farthest distance

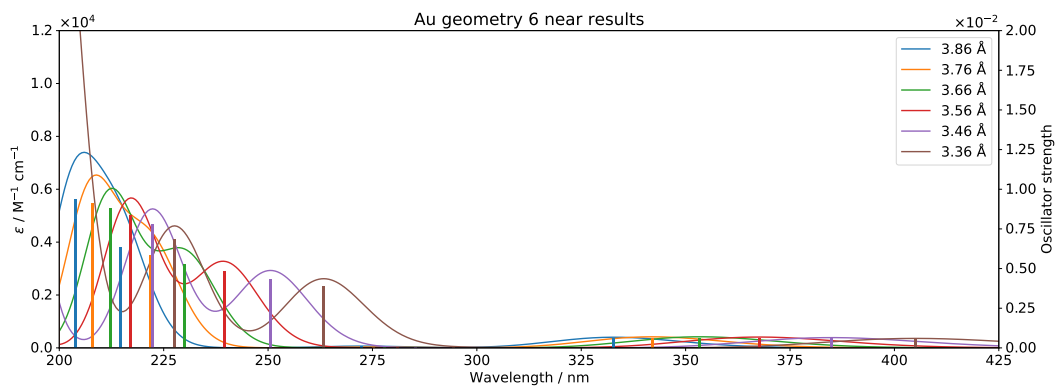

(b) UV-VIS: Formaldehyde in geometry 1. The six nearest distances

Figure 12: Results for Au geometry 6
